# Supplementary material for: Exploring the compositional space of a metal–organic framework with ionic liquids to develop porous ionic conductors for enhanced signal and selectivity in VOC capacitive sensors
Source: Royal Society of Chemistry journal article supplement (doi:10.1039/d4ta00959b), 2024-01-01
Supplement: d4ta00959b1.pdf [file d4ta00959b1.pdf]

## Supporting information

### Exploring the Compositional Space of a Metal-Organic Framework with Ionic Liquids to develop Porous Ionic Conductors for Enhanced Signal and Selectivity in VOC Capacitive Sensors

Bruna F. Gonçalves<sup>\*1</sup>, Eduardo Fernández<sup>1</sup>, Ainara Valverde<sup>1</sup>, Mattia Gaboardi<sup>2</sup>, Hugo Salazar<sup>1</sup>, Viktor Petrenko<sup>1,3</sup>, José María Porro<sup>1,3</sup>, Leide P. Cavalcanti<sup>4</sup>, Karmele Urtiaga<sup>5</sup>, José M.S.S. Esperança<sup>6</sup>, Daniela M. Correia<sup>7</sup>, Felix Fernandez-Alonso<sup>2,3,8</sup>, Senentxu Lanceros-Mendez<sup>1,3</sup>, Roberto Fernández de Luis<sup>1</sup>

<sup>1</sup>BCMaterials, Basque Center for Materials, Applications and Nanostructures, UPV/EHU Science Park, 48940 Leioa, Spain

<sup>2</sup>Materials Physics Center, CSIC-UPV/EHU, Paseo Manuel de Lardizabal 5, 20018, Donostia - San Sebastian, Spain

<sup>3</sup>IKERBASQUE, Basque Foundation for Science, 48009 Bilbao, Spain

<sup>4</sup>ISIS Neutron and Muon Source, Science and Technology Facilities Council, Rutherford Appleton Laboratory, Didcot OX11 0QX, United Kingdom

<sup>5</sup>Geology Department, University of the Basque Country (UPV/EHU), Barrio Sarriena s/n, 48940, Leioa, Spain

<sup>6</sup>LAQV, REQUIMTE, Departamento de Química, Faculdade de Ciências e Tecnologia, Universidade Nova de Lisboa, 2829-516, Lisboa, Portugal

<sup>7</sup>Chemistry Centre of Minho and Porto Universities (CF-UM-UP), University of Minho, 4710-057, Braga, Portugal

<sup>8</sup>Donostia International Physics Center (DIPC), Paseo Manuel de Lardizabal 4, 20018 Donostia San Sebastian, Spain

<sup>9</sup>Physics Centre of Minho and Porto Universities (CF-UM-UP), University of Minho, 4710-057, Braga, Portugal

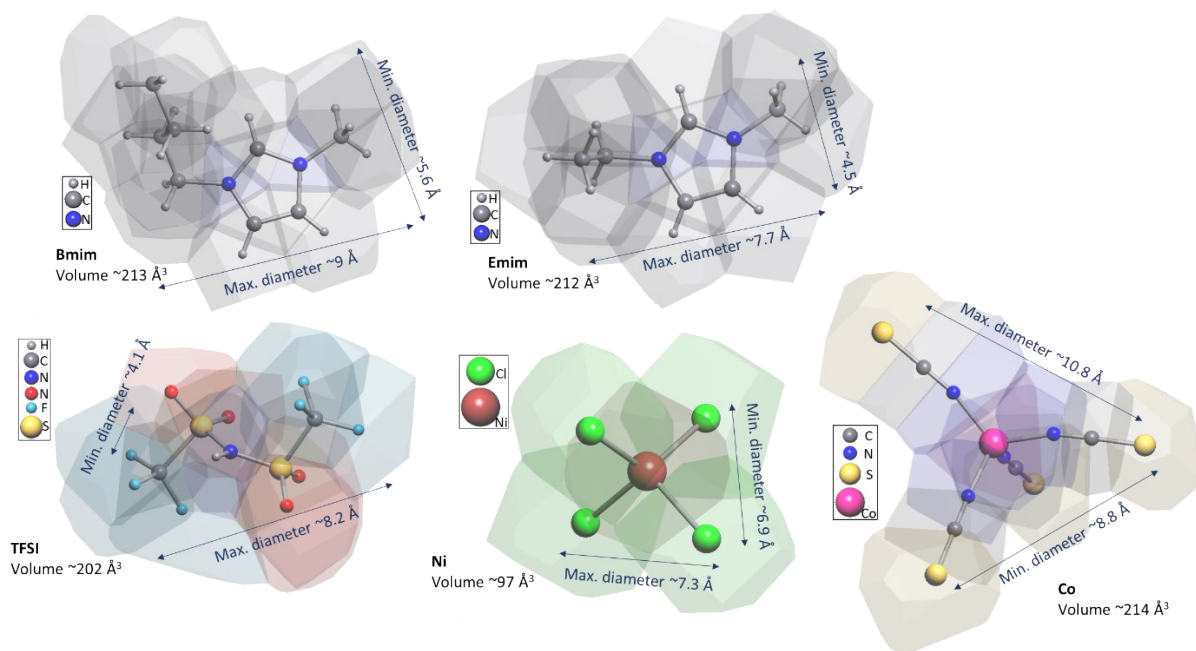

**Figure S1.** Cations and anions of the IL with the corresponding volume and minimum and maximum diameter.

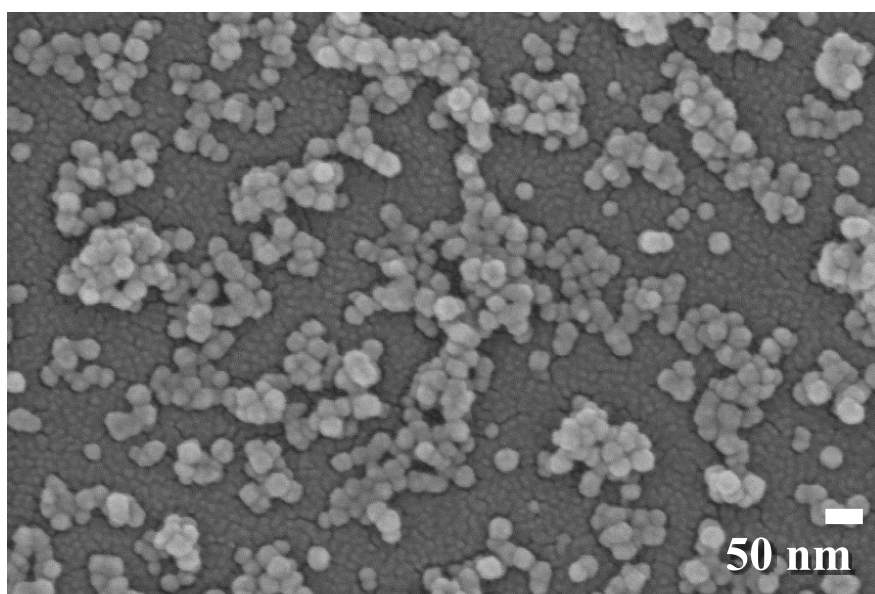

**Figure S2.** Scanning electron microscopy of the synthesized ZIF-8 nanoparticles.

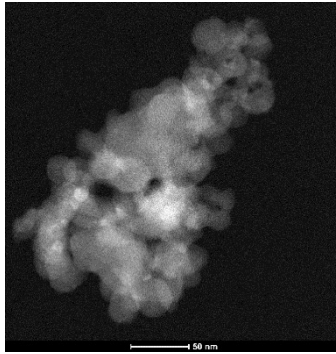

**Figure S3.** HAADF-STEM image of the synthesized ZIF-8 nanoparticles.

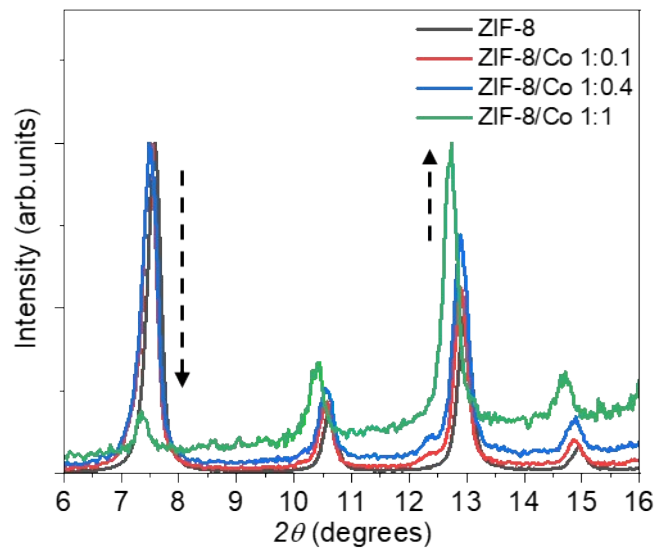

**Figure S4.** X-Ray diffraction patterns of neat ZIF-8 and ZIF-8/IL Co samples. The intensity increase/decrease trend is indicated by arrows.

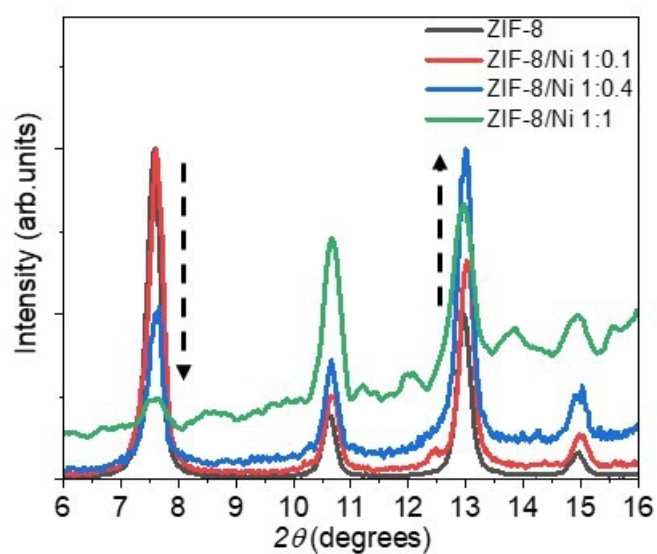

**Figure S5.** X-Ray diffraction patterns of neat ZIF-8 and ZIF-8/IL Ni samples. The intensity increase/decrease trend is indicated by arrows.

**Table S1.** Cell parameters obtained from the pattern matching fittings for ZIF-8/IL-Ni and ZIF-8/IL-Co samples.

| Sample              | Cell parameters (Å) |
|---------------------|---------------------|
| ZIF-8/IL-Ni (1:0.1) | 17.0090             |
| ZIF-8/IL-Ni (1:0.4) | 17.0935             |
| ZIF-8/IL-Ni (1:1)   | 17.1860             |
| ZIF-8/IL-Co (1:0.1) | 17.0381             |
| ZIF-8/IL-Co (1:0.4) | 17.0350             |
| ZIF-8/IL-Co (1:1)   | 17.1450             |

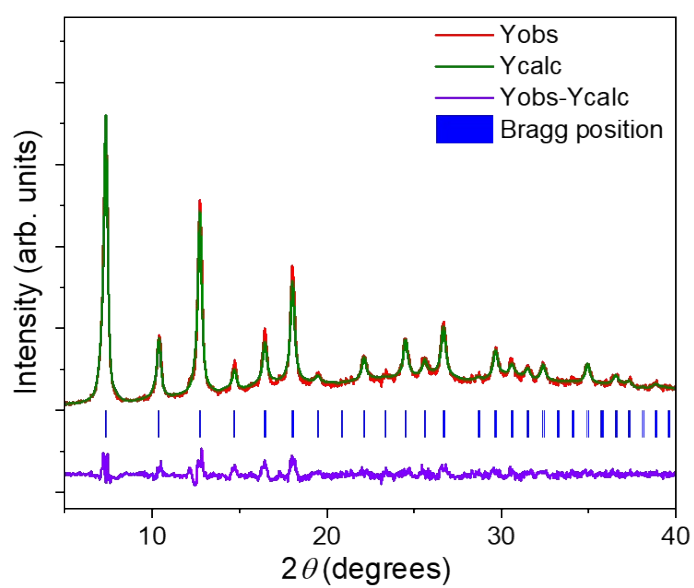

**Figure S6.** Fitting of the XRD patterns of ZIF-8/IL-Co 1:0.4  $\chi^2=1.70$  by a full profile matching.

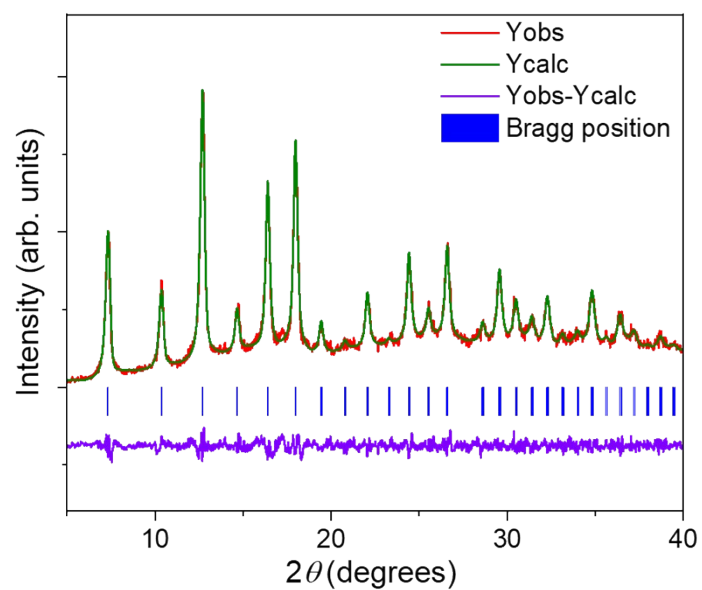

**Figure S7.** Fitting of the XRD patterns of ZIF-8/IL-Ni 1:0.4  $\chi^2=0.96$  by a full profile matching.

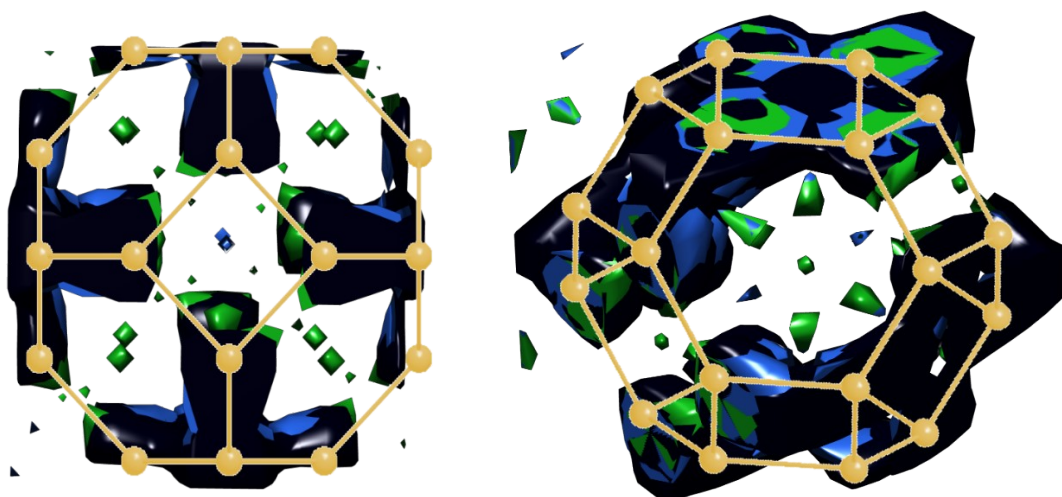

**Figure S8.** Difference envelope density simulations for ZIF-8 and ZIF-8/IL Co 1:0.4 and 1:1 samples. Black for ZIF-8, blue for ZIF-8/IL Co 1:0.4, green for ZIF-8/IL Co 1:1. The ZIF-8 chemical structure is represented in yellow.

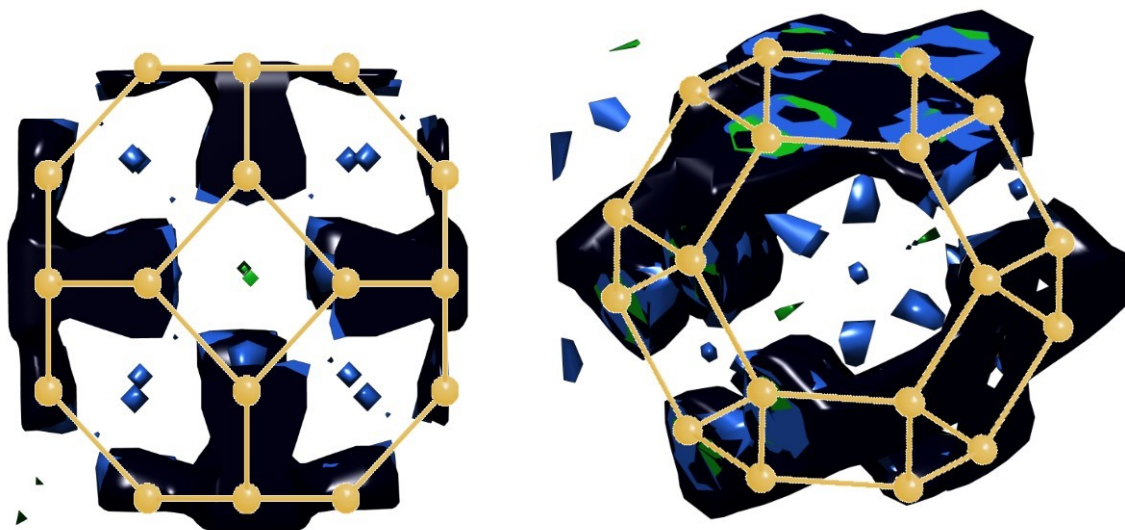

**Figure S9.** Difference envelope density simulations for ZIF-8 and ZIF-8/IL Ni 1:0.4 and 1:1 samples. Black for ZIF-8, blue for ZIF-8/IL Ni 1:0.4, green for ZIF-8/IL Ni 1:1. The ZIF-8 chemical structure is represented in yellow.

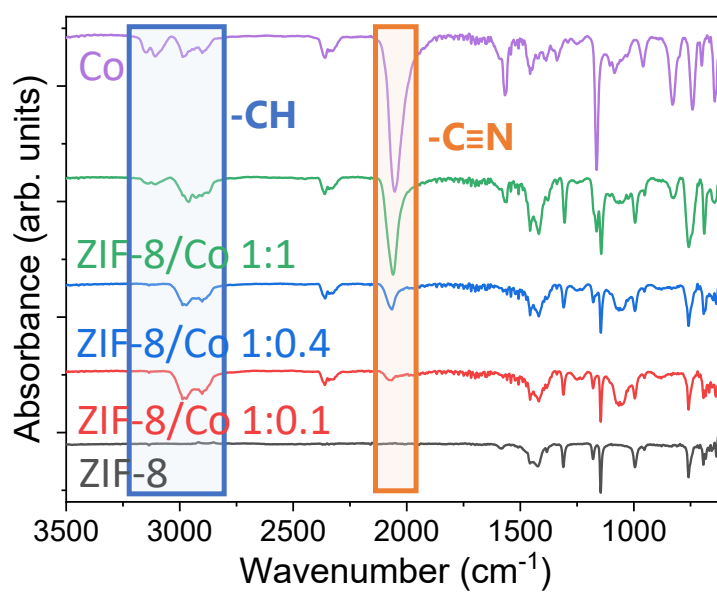

**Figure S10.** Fourier-transform infrared spectra of neat ZIF-8, ZIF-8/IL Co (1:0.1, 1:0.4 and 1:1), and neat IL Co samples.

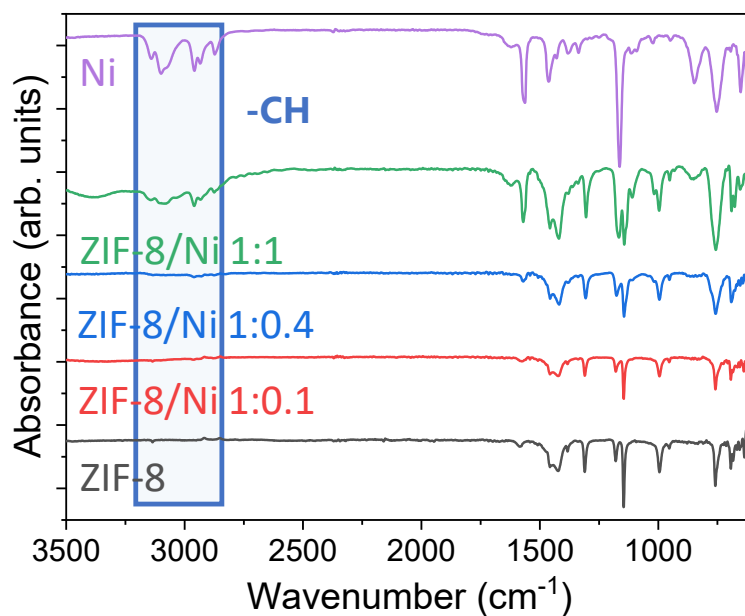

**Figure S11.** Fourier-transform infrared spectra of neat ZIF-8, ZIF-8/IL Ni (1:0.1, 1:0.4 and 1:1), and neat IL Ni samples.

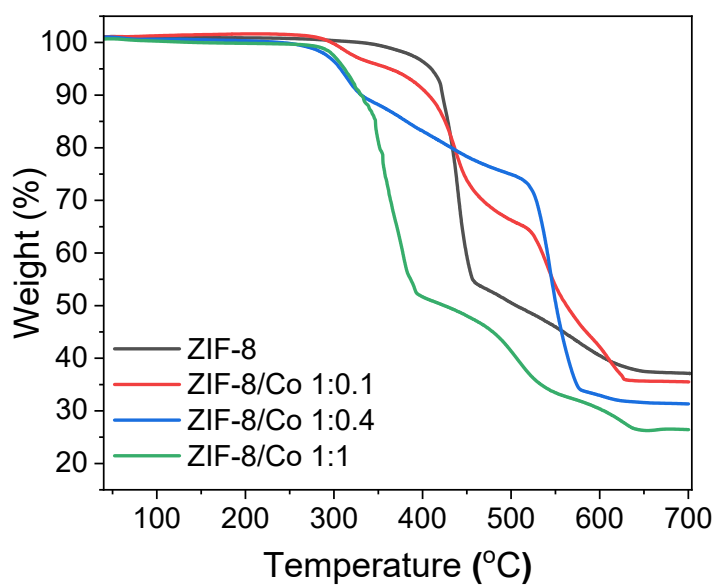

**Figure S12.** Thermogravimetric analysis curves of neat ZIF-8 and ZIF-8/IL Co (1:0.1, 1:0.4 and 1:1) samples.

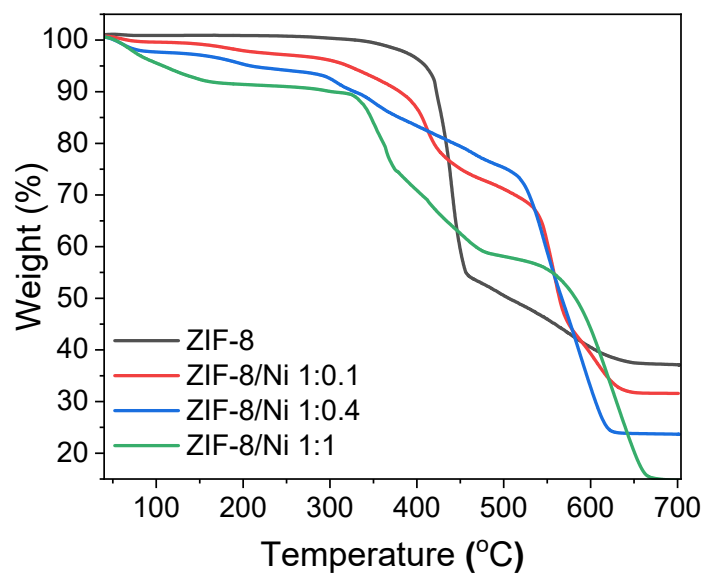

**Figure S13.** Thermogravimetric analysis curves of neat ZIF-8 and ZIF-8/IL Ni (1:0.1, 1:0.4 and 1:1) samples.

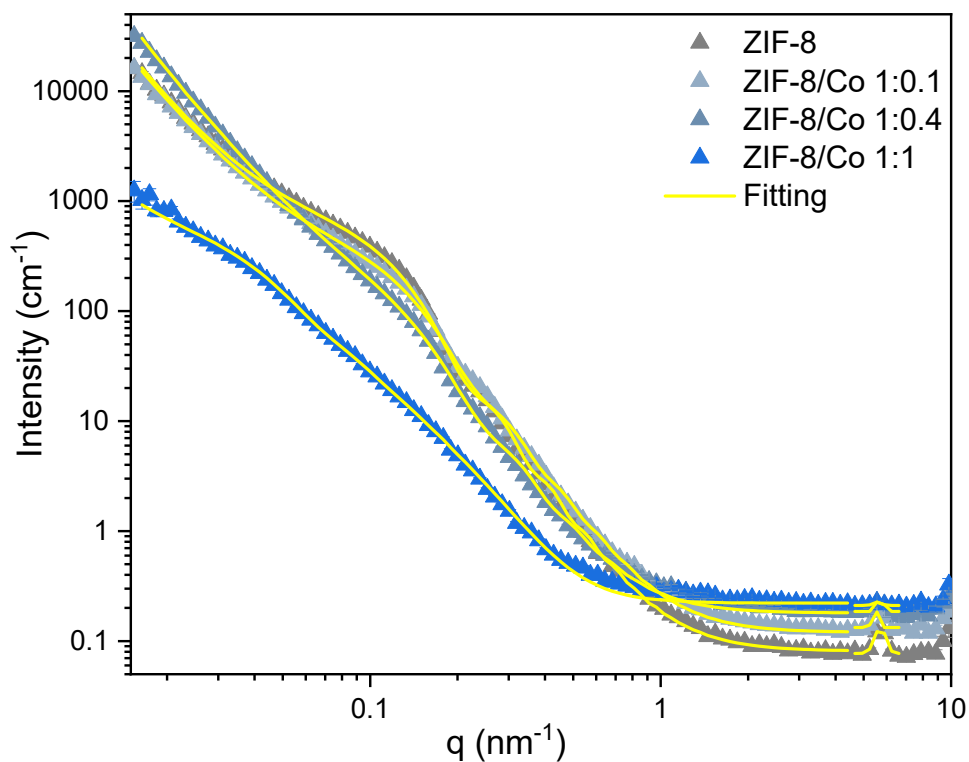

**Figure S14.** Small angle neutron scattering data of ZIF-8 and ZIF-8/Co (1:0.1, 1:0.4 and 1:1) composites with corresponding fitting.



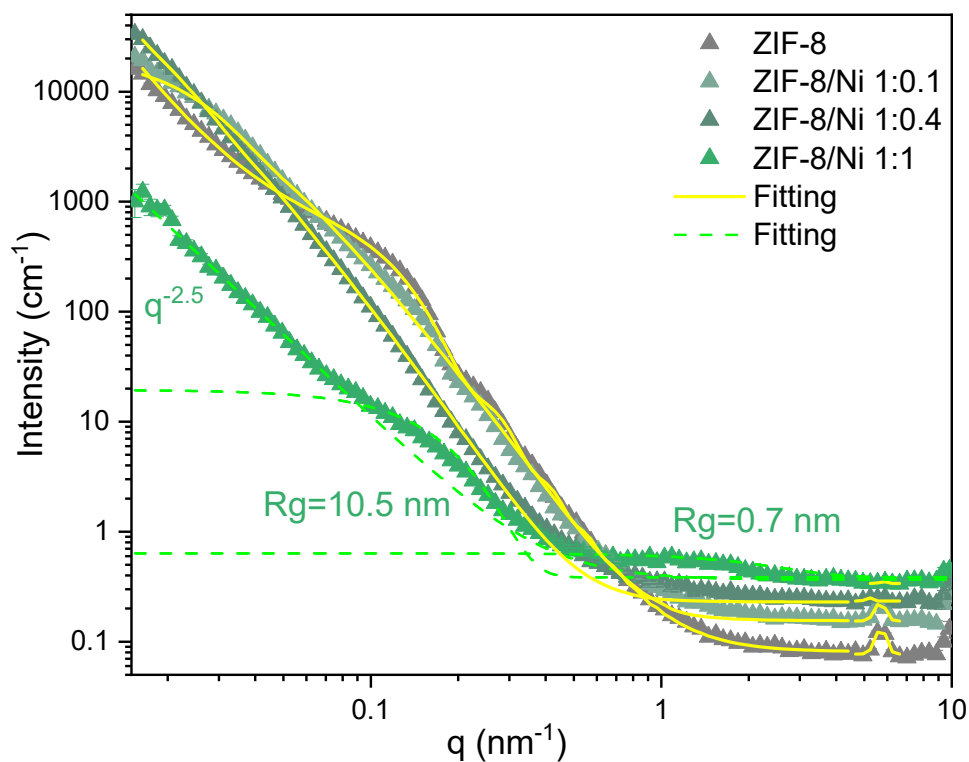

**Figure S15.** Small angle neutron scattering data of ZIF-8 and ZIF-8/Ni (1:0.1, 1:0.4 and 1:1) composites with corresponding fitting.

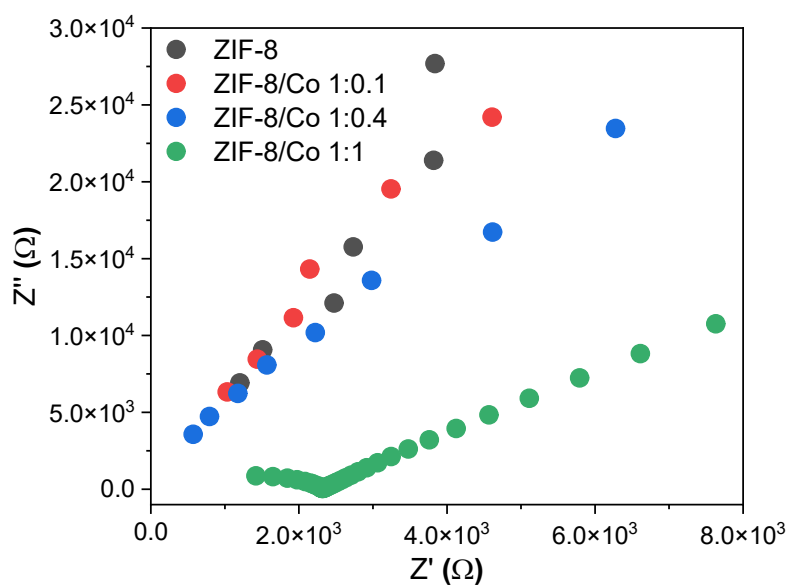

**Figure S16.** Nyquist plots of neat ZIF-8 and ZIF-8/IL Co (1:0.1, 1:0.4 and 1:1) samples.

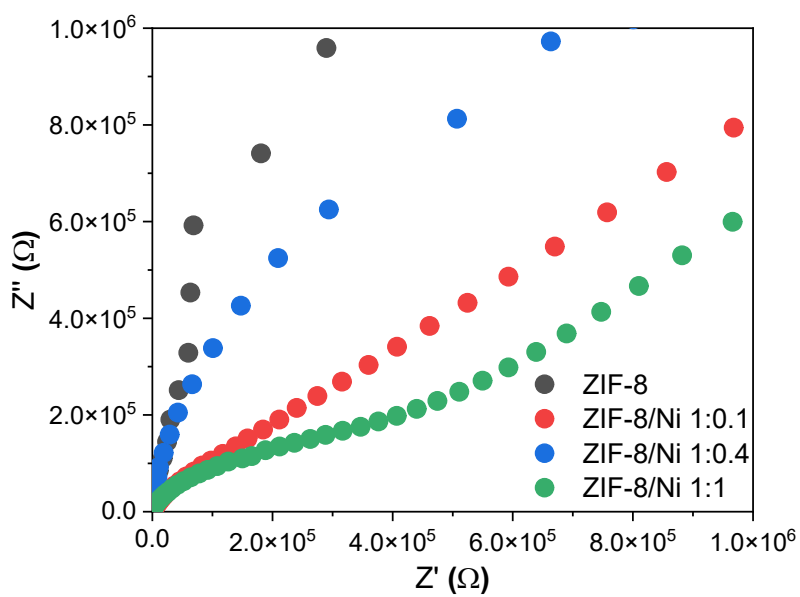

**Figure S17.** Nyquist plots of neat ZIF-8 and ZIF-8/IL Ni (1:0.1, 1:0.4 and 1:1) samples.

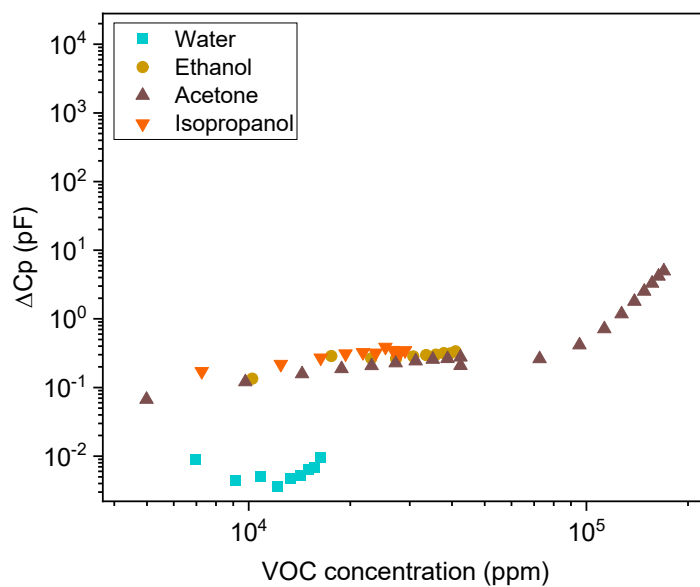

**Figure S18.**  $\Delta C_p$  vs VOC concentration data for IPA, acetone, ethanol, and water vapour for ZIF-8/Co 1:0.4.

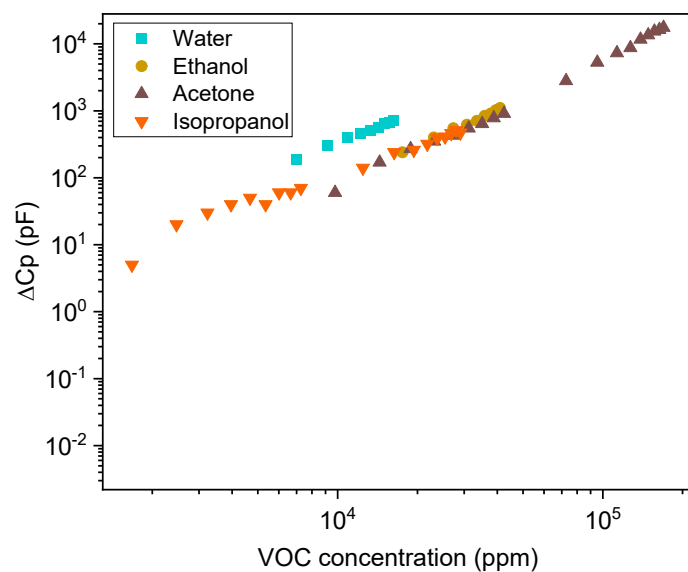

**Figure S19.**  $\Delta C_p$  vs VOC concentration data for IPA, acetone, ethanol, and water vapour for IL Co.

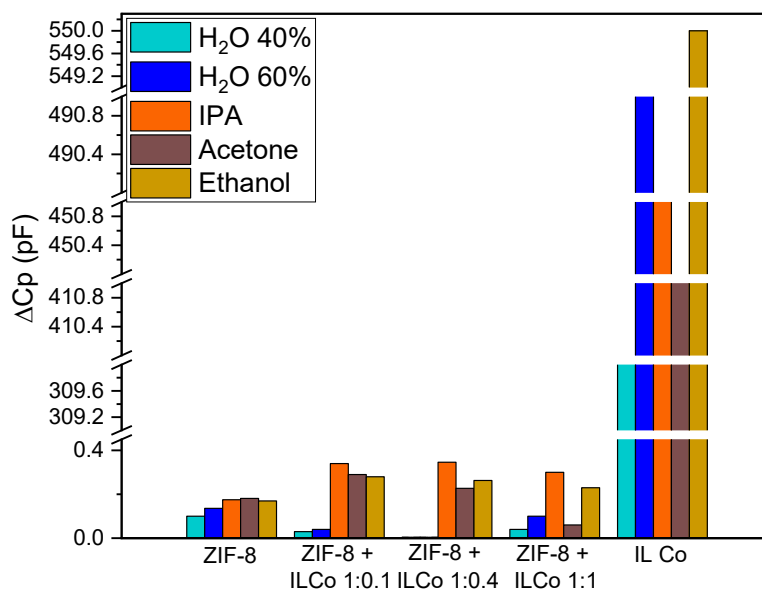

**Figure S20.** Bar chart with  $\Delta C_p$  for neat ZIF-8, ZIF-8/Co (1:0.1, 1:0.4, and 1:1), and IL Co for 40 and 60% relative humidity, IPA, acetone, ethanol, and water.

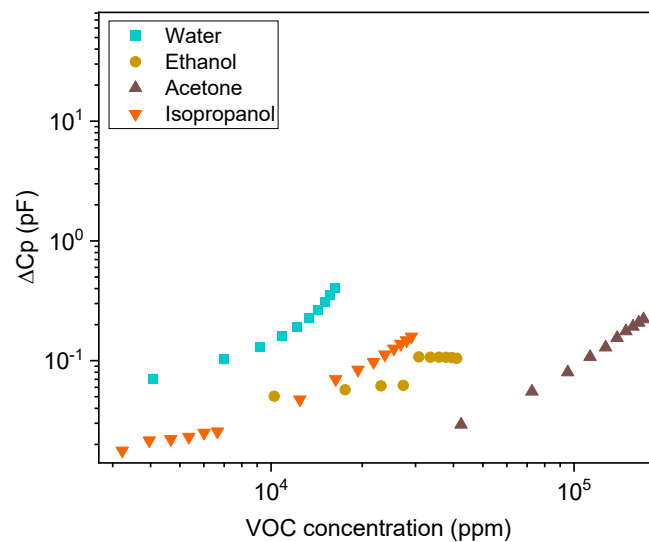

**Figure S21.**  $\Delta C_p$  vs VOC concentration data for IPA, acetone, ethanol, and water vapour for ZIF-8/Ni 1:0.4.

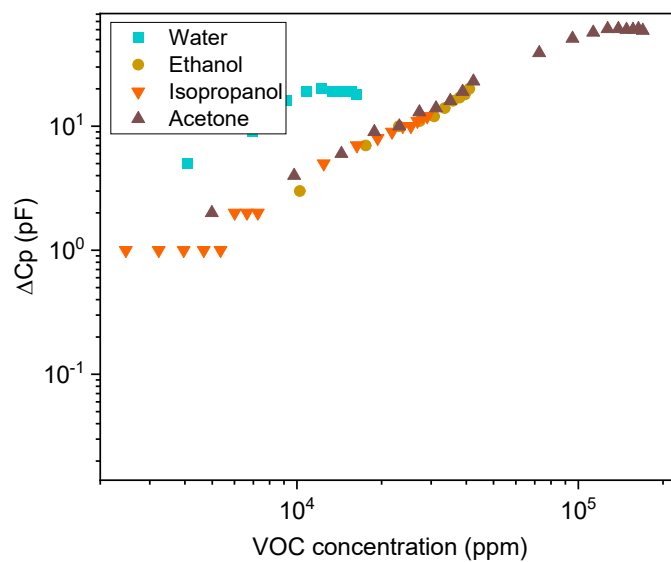

**Figure S22.**  $\Delta C_p$  vs VOC concentration data for IPA, acetone, ethanol, and water vapour for IL Ni.

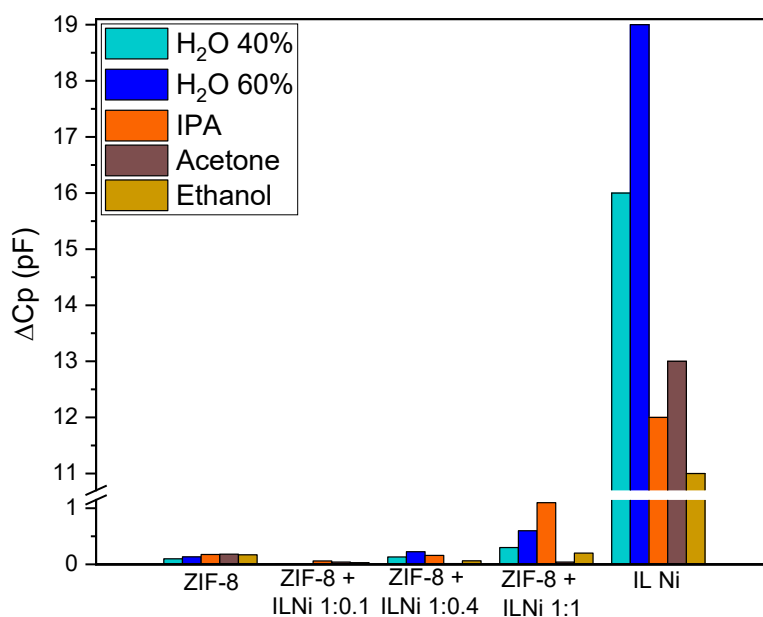

**Figure S23.** Bar chart with  $\Delta C_p$  for neat ZIF-8, ZIF-8/Ni (1:0.1, 1:0.4, and 1:1), and IL Ni for 40 and 60% relative humidity, IPA, acetone, ethanol, and water.

**Table S2.** Sensors evaluation in means of LoD and sensitivity towards each vapour (water, ethanol, IPA, and acetone).

| Sample                            | Vapour  | LoD (ppm) | Sensitivity (pF/ppm) | Sensitivity* (pF/ppm) |
|-----------------------------------|---------|-----------|----------------------|-----------------------|
| <b>ZIF-8/TFSI</b><br><b>1:0.1</b> | Water   | 16048     | $1.3 \times 10^{-5}$ | ---                   |
|                                   | Ethanol | 7151      | $7.0 \times 10^{-5}$ | ---                   |
|                                   | IPA     | 8080      | $6.0 \times 10^{-5}$ | ---                   |
|                                   | Acetone | 9842      | $2.4 \times 10^{-5}$ | $7.4 \times 10^{-4}$  |
| <b>ZIF-8/TFSI</b><br><b>1:1</b>   | Water   | 6841      | $2.4 \times 10^{-6}$ | ---                   |
|                                   | Ethanol | 4476      | $2.4 \times 10^{-6}$ | $8.2 \times 10^{-6}$  |
|                                   | IPA     | 4042      | $4.9 \times 10^{-6}$ | ---                   |
|                                   | Acetone | 6886      | $3.1 \times 10^{-6}$ | $2.2 \times 10^{-4}$  |
| <b>IL Co</b>                      | Water   | 3424      | $4.6 \times 10^{-2}$ | ---                   |
|                                   | Ethanol | 11598     | $2.7 \times 10^{-2}$ | ---                   |
|                                   | IPA     | 4930      | $1.8 \times 10^{-2}$ | ---                   |
|                                   | Acetone | 9554      | $2.2 \times 10^{-2}$ | $1.6 \times 10^{-1}$  |
| <b>ZIF-8/Co</b><br><b>1:0.1</b>   | Water   | 17984     | $2.6 \times 10^{-6}$ | ---                   |
|                                   | Ethanol | 16167     | $1.9 \times 10^{-5}$ |                       |
|                                   | IPA     | 11368     | $1.3 \times 10^{-5}$ |                       |
|                                   | Acetone | 109214    | $5.3 \times 10^{-6}$ |                       |

|                           |         |       |                      |                      |
|---------------------------|---------|-------|----------------------|----------------------|
| <b>ZIF-8/Co<br/>1:0.4</b> | Water   | 9282  | $4.6 \times 10^{-7}$ | ---                  |
|                           | Ethanol | 11955 | $7.5 \times 10^{-6}$ | ---                  |
|                           | IPA     | 11728 | $1.1 \times 10^{-5}$ | ---                  |
|                           | Acetone | 13558 | $6.1 \times 10^{-6}$ | $8.9 \times 10^{-5}$ |
| <b>ZIF-8/Co 1:1</b>       | Water   | 6240  | $7.5 \times 10^{-6}$ | ---                  |
|                           | Ethanol | 18297 | $7.6 \times 10^{-6}$ | $4.2 \times 10^{-5}$ |
|                           | IPA     | 6951  | $2.6 \times 10^{-6}$ | $2.1 \times 10^{-5}$ |
|                           | Acetone | 9545  | $2.8 \times 10^{-6}$ | $1.6 \times 10^{-3}$ |
| <b>IL Ni</b>              | Water   | 7089  | $1.2 \times 10^{-3}$ | ---                  |
|                           | Ethanol | 6660  | $4.8 \times 10^{-4}$ |                      |
|                           | IPA     | 3012  | $4.4 \times 10^{-4}$ |                      |
|                           | Acetone | 10718 | $5.1 \times 10^{-4}$ |                      |
| <b>ZIF-8/Ni<br/>1:0.1</b> | Water   | 10925 | $8.9 \times 10^{-7}$ | ---                  |
|                           | Ethanol | 17660 | $1.4 \times 10^{-6}$ |                      |
|                           | IPA     | 30516 | $1.6 \times 10^{-6}$ |                      |
|                           | Acetone | 45433 | $5.8 \times 10^{-7}$ |                      |
| <b>ZIF-8/Ni<br/>1:0.4</b> | Water   | 1480  | $1.5 \times 10^{-5}$ | $6.0 \times 10^{-5}$ |
|                           | Ethanol | 15507 | $2.6 \times 10^{-6}$ | ---                  |
|                           | IPA     | 4883  | $5.2 \times 10^{-6}$ | ---                  |
|                           | Acetone | 16693 | $8.3 \times 10^{-7}$ | $2.1 \times 10^{-6}$ |
| <b>ZIF-8/Ni 1:1</b>       | Water   | 5202  | $4.6 \times 10^{-5}$ | $4.6 \times 10^{-4}$ |
|                           | Ethanol | 14914 | $6.8 \times 10^{-6}$ | ---                  |
|                           | IPA     | 10615 | $1.2 \times 10^{-5}$ | $2.2 \times 10^{-4}$ |
|                           | Acetone | 41738 | $1.0 \times 10^{-6}$ | ---                  |

\* in the case of samples with two different linear regressions (one at low [VOC] and one at high [VOC]).
